# Supplementary material for: Free-standing ultrathin CoMn2O4 nanosheets anchored on reduced graphene oxide for high-performance supercapacitors
Source: Royal Society of Chemistry journal article supplement (doi:10.1039/c5dt03696h), 2015-01-01
Supplement: c5dt03696h1.pdf [file c5dt03696h1.pdf]

## Supporting Information

### Free-standing ultrathin $\text{CoMn}_2\text{O}_4$ nanosheets anchored on reduced graphene oxide for high-performance supercapacitors

Guoxin Gao,<sup>\*1</sup> Shiyao Lu<sup>1</sup>, Yang Xiang<sup>1</sup>, Bitao Dong<sup>1</sup>, Wei Yan<sup>2</sup>, Shujiang Ding<sup>\*1</sup>

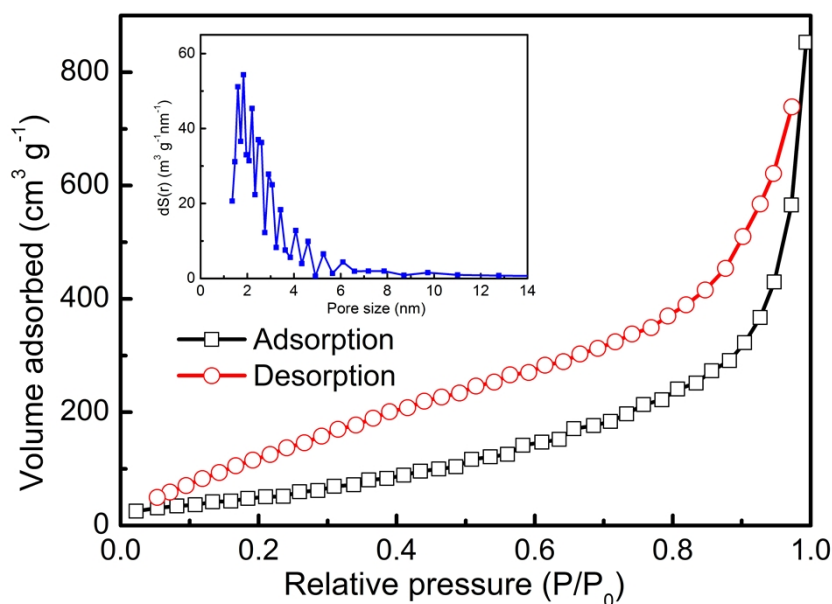

**Figure S1.**  $\text{N}_2$  adsorption-desorption isotherm of as-prepared  $\text{rGO@CoMn}_2\text{O}_4$  NSs (inset shows the pore size distribution curve obtained by the BJH method).

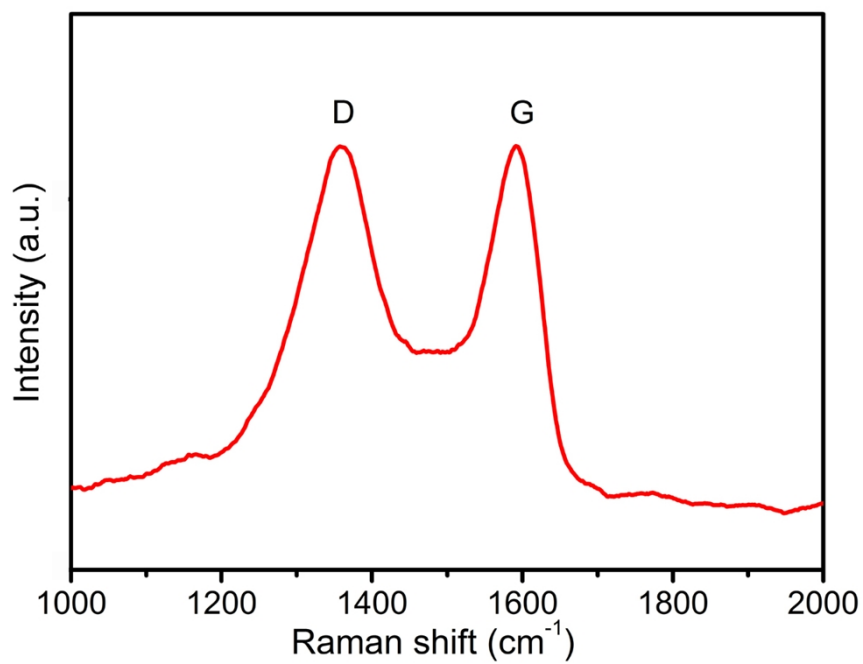

**Figure S2.** Raman spectrum of as-prepared rGO@CoMn<sub>2</sub>O<sub>4</sub> NSs.

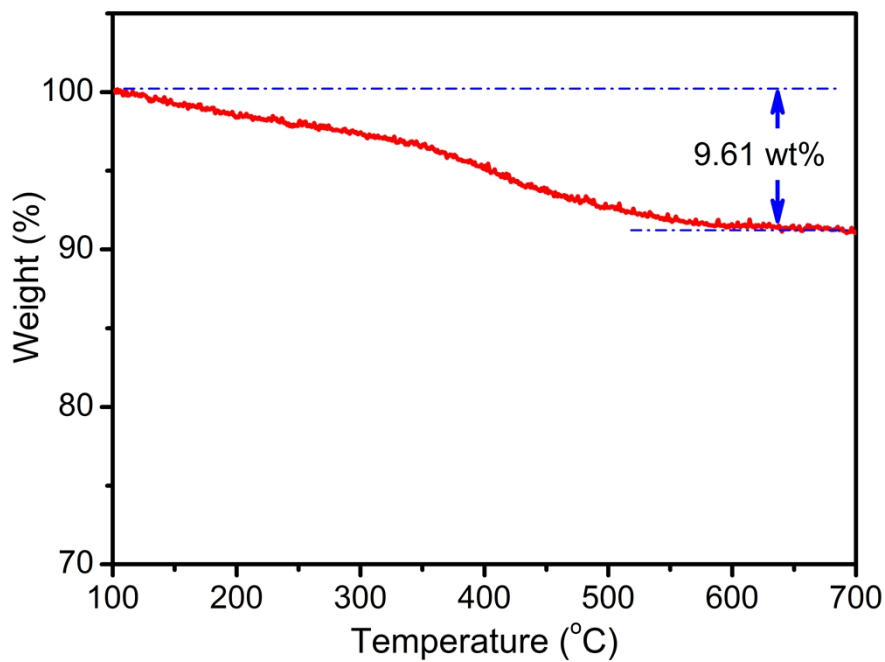

**Figure S3.** TGA curve of the rGO@CoMn<sub>2</sub>O<sub>4</sub> NSs in air between 100 and 600 °C with a heating rate of 10 °C min<sup>-1</sup>
